# Supplementary material for: Cannabis Use among Cancer Survivors amid the COVID-19 Pandemic: Results from the COVID-19 Cannabis Health Study
Source: MDPI journal article supplement (doi:10.3390/cancers13143495), 2021-07-13
Supplement: s1 [file s1]

## Article

# Cannabis Use among Cancer Survivors amid the COVID-19 Pandemic: Results from the COVID-19 Cannabis Health Study

Marlene Camacho-Rivera <sup>1</sup>, Jessica Y. Islam <sup>2</sup>, Diane L. Rodriguez <sup>3</sup> and Denise C. Vidot <sup>4,\*</sup>

<sup>1</sup> Department of Community Health Sciences, School of Public Health, SUNY Downstate Health Sciences University, Brooklyn, NY 11203, USA; marlene.camacho-rivera@downstate.edu

<sup>2</sup> Cancer Epidemiology Program, H. Lee Moffitt Cancer Center and Research Institute, Tampa, FL 33612, USA; jessica.islam@moffitt.org

<sup>3</sup> Morsani College of Medicine, University of South Florida, Tampa, FL 33602, USA; dianer@usf.edu

<sup>4</sup> School of Nursing and Health Studies, University of Miami, Coral Gables, FL 33146, USA; dvidot@med.miami.edu

\* Correspondence: dvidot@med.miami.edu

**Table S1.** Substance Use.

|                          | Total |       | Adults Without Cancer |       | Cancer Survivors |       | p-value |
|--------------------------|-------|-------|-----------------------|-------|------------------|-------|---------|
|                          | No.   | Col % | No.                   | Col % | No.              | Col % |         |
| Tobacco Use              |       |       |                       |       |                  |       | 0.147   |
| More since COVID-19      | 10    | 6.3   | 4                     | 5.1   | 6                | 7.6   |         |
| Less Since COVID-19      | 6     | 3.8   | 1                     | 1.3   | 5                | 6.3   |         |
| No Change since COVID-19 | 52    | 32.9  | 23                    | 29.1  | 29               | 36.7  |         |
| Never Use                | 90    | 57    | 51                    | 64.6  | 39               | 49.4  |         |
| Alcohol Use              |       |       |                       |       |                  |       | 0.351   |
| More since COVID-19      | 18    | 11.5  | 10                    | 12.8  | 8                | 10.3  |         |
| Less Since COVID-19      | 16    | 10.3  | 11                    | 14.1  | 5                | 6.4   |         |
| No Change since COVID-19 | 74    | 47.4  | 36                    | 46.2  | 38               | 48.7  |         |
| Never Use                | 48    | 30.8  | 21                    | 26.9  | 27               | 34.6  |         |
| Opioid Use               |       |       |                       |       |                  |       | 0.244   |
| More since COVID-19      | 3     | 1.9   | 0                     | 0     | 3                | 3.8   |         |
| Less Since COVID-19      | 4     | 2.6   | 1                     | 1.3   | 3                | 3.8   |         |
| No Change since COVID-19 | 39    | 25    | 20                    | 25.6  | 19               | 24.4  |         |
| Never Use                | 110   | 70.5  | 57                    | 73.1  | 53               | 67.9  |         |
| Methamphetamine Use      |       |       |                       |       |                  |       | 0.632   |
| More since COVID-19      |       |       |                       |       |                  |       |         |
| Less Since COVID-19      |       |       |                       |       |                  |       |         |
| No Change since COVID-19 | 24    | 15.7  | 11                    | 14.3  | 13               | 17.1  |         |
| Never Use                | 129   | 84.3  | 66                    | 85.7  | 63               | 82.9  |         |
| Cocaine Use              |       |       |                       |       |                  |       | 0.942   |
| More since COVID-19      |       |       |                       |       |                  |       |         |
| Less Since COVID-19      | 4     | 2.6   | 2                     | 2.6   | 2                | 2.6   |         |
| No Change since COVID-19 | 34    | 21.9  | 18                    | 23.1  | 16               | 20.8  |         |
| Never Use                | 117   | 75.5  | 58                    | 74.4  | 59               | 76.6  |         |
| Psilocybin Use           |       |       |                       |       |                  |       | 0.101   |
| More since COVID-19      | 3     | 2     | 1                     | 1.3   | 2                | 2.7   |         |
| Less Since COVID-19      | 4     | 2.6   | 4                     | 5.2   | 0                | 0     |         |
| No Change since COVID-19 | 37    | 24.3  | 22                    | 28.6  | 15               | 20    |         |
| Never Use                | 108   | 71.1  | 50                    | 64.9  | 58               | 77.3  |         |
